# 1 **A fuzzy encounter complex precedes formation of the fully-** 2 **engaged TIR1-Aux/IAA auxin co-receptor system**

3 Sigurd Ramans Harborough<sup>1</sup>, Arnout P. Kalverda<sup>1</sup>, Gary S. Thompson<sup>2</sup>, Martin Kieffer<sup>1</sup>,  
4 Martin Kubes<sup>3</sup>, Mussa Quareshy<sup>3</sup>, Veselina Uzunova<sup>3</sup>, Justyna M. Prusinska<sup>3</sup>, Ken-ichiro  
5 Hayashi<sup>5</sup>, Richard Napier<sup>3</sup>, Iain W. Manfield<sup>1</sup>, Stefan Kepinski<sup>1\*</sup>

6 <sup>1</sup>Centre for Plant Sciences (S.R.H., M.K., S.K.) and Astbury Centre for Structural Molecular  
7 Biology (A.P.K., I.W.M.), Faculty of Biological Sciences, University of Leeds, Leeds LS2 9JT,  
8 U.K.

9 <sup>2</sup>School of Biosciences, University of Kent, Canterbury CT2 7NJ, U.K.

10 <sup>3</sup>School of Life Sciences, University of Warwick, Gibbet Hill Road, Coventry CV4 7AL, U.K.

11 <sup>4</sup>Department of Biochemistry, Okayama University of Science, Okayama 700-0005, Japan

12 \*Correspondence should be addressed to S.K. (email: [s.kepinski@leeds.ac.uk](mailto:s.kepinski@leeds.ac.uk)).

## 13 **Author contributions**

14 S.R.H. performed and analysed the majority of the experiments, assisted by A.P.K., G.S.T.,  
15 M.K.<sup>1</sup>, K.H. and I.W.M. The SPR assay of cvxIAA was performed by M.K.<sup>3</sup>. The TIR1 protein  
16 production was facilitated by M.Q., V.U., J.M.P., M.K.<sup>3</sup> and R.N. All authors commented on  
17 the manuscript. S.R.H., A.P.K., R.N., I.W.M. and S.K. wrote the manuscript.

18

19

20

21

22

23

24

25

26

27

28

29

## 30 **Abstract**

31 The plant hormone auxin regulates almost every aspect of plant development via the  
32 TIR1/AFB-auxin-Aux/IAA auxin co-receptor complex. Within this ternary complex, auxin acts  
33 as a molecular glue to promote the binding of Aux/IAA transcriptional repressor proteins to  
34 SCF<sup>TIR1/AFB</sup> ubiquitin-ligase complexes, thereby catalysing their ubiquitin-mediated  
35 proteolysis. A conspicuous feature of the crystal structure of the complex is a rare *cis* W-P  
36 bond within the Aux/IAA degron motif. To study receptor complex assembly, we have used  
37 NMR to determine the solution structure of the amino-terminal half of the Aux/IAA protein  
38 AXR3/IAA17, including the degron, both in isolation and in complex with TIR1 and auxin. We  
39 show that this region of AXR3 is intrinsically-disordered with only limited elements of  
40 structure and yet the critical degron W-P bond occurs with an unusually high (1:1) ratio of *cis*  
41 to *trans* isomers. We show that assembly of the co-receptor complex involves both auxin-  
42 dependent and -independent interaction events in which the disorder of the Aux/IAA is  
43 retained. Further, using the synthetic auxin molecule cvxIAA and by analysing specific  
44 Aux/IAA conformers, we show that a subset of auxin-dependent binding events occur away  
45 from the base of the canonical auxin binding pocket in TIR1. Our results reveal the existence  
46 of a fuzzy, topologically-distinct ternary encounter complex and thus that auxin perception is  
47 not limited to sequential, independent binding of auxin and then Aux/IAA to TIR1.

48

## 49 **Introduction**

50 Auxin is a central signalling molecule in plant biology with roles in both the patterning of  
51 developmental events and the regulation of cellular growth. Much of this capacity for control  
52 arises from its ability to alter programmes of gene expression. This is achieved through a  
53 remarkably short signal transduction pathway that sees auxin promote the destruction of the  
54 Aux/IAA co-receptor/co-repressor proteins by interacting directly with both the Aux/IAA and a  
55 member of the TIR1/AFB family of F-box protein auxin co-receptors (Supplementary Fig. 1).

56 The TIR1/AFB F-box proteins are the substrate-selection components of a multi-protein  
57 SCF-type E3 ubiquitin-ligase called SCF<sup>TIR1/AFB</sup>. The formation of the TIR1/AFB-auxin-  
58 Aux/IAA co-receptor complex promotes the ubiquitination and consequent degradation of the  
59 Aux/IAA protein by detaining it in the vicinity of ubiquitin-conjugating enzymes that associate  
60 with the core catalytic components of SCF<sup>TIR1/AFB</sup>. In this way the Aux/IAA proteins become  
61 polyubiquitinated and so targeted for degradation in the 26S proteasome (reviewed<sup>1-3</sup>). The  
62 rapid removal of Aux/IAAs in response to increases in auxin concentration prompts the  
63 derepression of the genes to which they are targeted via their interaction with the AUXIN  
64 RESPONSE FACTOR (ARF) family of DNA-binding transcription factors (reviewed<sup>4,5</sup>)  
65 (Supplementary Fig. 1). In higher plants the Aux/IAA and ARF families have multiple  
66 members with both overlapping and unique functions, providing a system rich in potential for  
67 complex control of gene expression in different cellular and developmental contexts<sup>2</sup>.

68 Aux/IAA proteins consist of four conserved domains, with domain I (DI) being associated  
69 with the transcriptional co-repressor activity of the Aux/IAA<sup>6-8</sup>, and domains III and IV  
70 mediating interaction with ARF transcription factors<sup>9,10</sup>. The region of the protein required for  
71 interaction with TIR1 is located within domain II (DII) of the protein. Within DII, a 13 amino  
72 acid degron motif has been defined that is necessary and sufficient for auxin-enhanced and  
73 ubiquitin-dependent proteolysis<sup>11-13</sup>.

74 The crystal structure of the fully-docked TIR1/AFB-auxin-Aux/IAA co-receptor complex has  
75 dominated our understanding of auxin perception<sup>14</sup>. This representation of the complex  
76 shows the auxin molecule, indole-3-acetic acid (IAA), bound in a pocket on the co-receptor  
77 protein TIR1 (hereafter called the auxin binding pocket) and entombed by the Aux/IAA core  
78 GWPPV degron motif (Fig. 1a,b). Intriguingly, the degron in this bound state shows a *cis*-  
79 prolyl imide bond between W86 and P87, raising questions about the impact of prolyl *cis*-  
80 *trans* isomerisation on the formation of the auxin co-receptor complex.

81 Indeed, specific sequence contexts in the Aux/IAA degron may establish the inherent  
82 stability of the *cis*-P87 isomer state. At a basal level, the typical population for a *cis* imide  
83 bond in a protein structure is 5-6%<sup>15</sup>. The *cis* population is enhanced when an aromatic  
84 amino acid precedes the prolyl bond<sup>16</sup>. From analysis of short peptides, the sequence  
85 combination W-P is expected to result in a 25% *cis* population for the imide bond between  
86 the two residues, with a decrease in the isomerisation rate from *cis* back to *trans*<sup>17</sup>. This *cis*  
87 isomer population is expected to be further enhanced by an additional C-terminal proline  
88 residue, giving a di-proline motif (in the AXR3 degron W86-*cis*-P87-*trans*-P88), where the  
89 *cis-trans* conformer population is expected to be 37%<sup>18</sup>, a value very close to the 36%  
90 previously reported for the degron W-P bond in peptides for the rice Aux/IAA OsIAA11<sup>19,20</sup>.

91 To date there has been no structural information of a full-length Aux/IAA protein. The most  
92 complete structures of Aux/IAA proteins are of the carboxy-terminal (C-terminal) half of the  
93 protein including domains DIII and DIV/PB1<sup>3,10</sup>, which are not directly involved in auxin  
94 perception. The amino-terminal (N-terminal) half (DI and DII) of the Aux/IAA, including the  
95 degron motif that is required for interaction with TIR1/AFBs and hence auxin sensing, is  
96 predicted by bioinformatics to be intrinsically disordered<sup>21</sup>. In broad terms, intrinsic disorder  
97 describes a protein or protein region that cannot be fully represented by a single 3D  
98 structure<sup>22,23</sup>. Intrinsically disorder in proteins can be further refined into classifications of  
99 static or dynamic disorder<sup>22</sup>. Static disorder refers to a protein or protein region that adopts  
100 multiple stable conformations. Where a protein constantly fluctuates between conformations  
101 the disorder is said to be dynamic. These distinctions can be extended to protein-protein  
102 complexes involving disordered proteins, which are termed as being fuzzy<sup>22</sup>. Such  
103 complexes can show static fuzziness, where disordered regions become ordered upon  
104 binding but form more than one conformation<sup>22,23</sup>. Where the disordered protein or protein  
105 region fails to undergo a disorder-to-order transition upon binding the fuzziness of the  
106 complex is said to be dynamic<sup>22</sup>. The existence, nature, and fate of any intrinsic disorder  
107 within Aux/IAAs has until now been unknown.

108 Here, we have used nuclear magnetic resonance (NMR) spectroscopy to characterise the  
109 solution structure of the 101 amino acid N-terminal half (DI/DII) of the Aux/IAA protein AXR3  
110 both in isolation and in complex with TIR1 and auxin. We show that the N-terminal half of  
111 AXR3 is intrinsically disordered and yet contains elements of transient secondary structure  
112 and an unusually high occupancy of the *cis* state for a critical W-P bond within the degron  
113 motif. This W-*cis*-P degron conformer supports the highest level of ternary complex  
114 formation, assisted by a binding interface which extends C-terminal to the degron.  
115 Throughout receptor complex formation, the disordered state of the Aux/IAA remains. We  
116 show that there are stages of complex assembly that are mediated by auxin-dependent and  
117 -independent binding events occurring away from the base of the auxin binding pocket in  
118 TIR1. In addition to indicating the existence of an early, lower-affinity encounter complex  
119 these data demonstrate that receptor complex assembly is not limited to the sequential  
120 binding of auxin and then Aux/IAA to TIR1, revealing additional steps at which functional  
121 specificity in the auxin perception process could arise. Together these data provide a  
122 framework for understanding the process of auxin perception through the formation of a  
123 fuzzy auxin receptor complex.

124

## 125 **Results**

### 126 **Structural characterisation of AXR3 domains I and II (DI/DII)**

127 We used solution-state NMR spectroscopy to study the structure of DI and DII of AXR3  
128 (AXR3 DI/DII, residues 1 to 101, Fig. 1b). We specifically chose to exclude the C-terminal  
129 PB1 domain to avoid multimerisation that would otherwise obfuscate the analysis of the  
130 regions of the protein directly involved in auxin perception. The N-terminal half (DI/DII) of  
131 AXR3 and the mutated variant *axr3-3* DI/DII were expressed as <sup>13</sup>C, <sup>15</sup>N isotopically-labelled  
132 proteins (Fig. 1b, methods: protein preparation). The following NMR backbone assignment  
133 experiments were performed: HNCA, HNcoCA, HNcaCB, CBcacoNH, HNcaCO, HNCO,

134 CON, hCACO, hCAnCO (Supplementary Tables 1 and 2). Together, these experiments  
135 resulted in the assignment of 99% of resonances in AXR3 DI/DII and the variant proteins.  
136 Our data show that the AXR3 degron is situated in an extensive region of dynamic intrinsic  
137 disorder, encompassing the majority of domains I and II. The  $^1\text{H}$ - $^{15}\text{N}$  Heteronuclear Single-  
138 Quantum Correlation (HSQC) spectrum for AXR3 DI/DII is characterised by signals  
139 occurring in a narrow  $^1\text{H}$  chemical shift region (7.9 to 8.6 ppm) (Fig. 1c,d). Despite extensive  
140 intrinsic disorder, our analyses of chemical shift indices and  $^{15}\text{N}$   $R_2$  relaxation rates also  
141 show a propensity to form secondary structure, which is transiently formed and observed  
142 only in a subset of the protein population at any one time<sup>24</sup>. This includes helical character at  
143 the N-terminus and a preference for extended structures in the  $\beta$ -region of phi/psi space at  
144 the C-terminus (Fig. 2a, Supplementary Figs. 2 & 3).

145 The nascent helical region corresponds to residues 7-16 of DI and includes the majority of  
146 the primary EAR motif of LXLXL (Fig. 2a and Supplementary Fig. 2), which forms a key  
147 interface for the recruitment of the co-repressor TOPLESS (TPL) (Supplementary Fig. 1). In  
148 contrast, the degron is situated (residues 82 to 94) within a cluster of weak  $\beta$ -secondary  
149 structure (Fig. 2a and Supplementary Fig. 2). In addition to these regions with propensity for  
150 secondary structure,  $^{15}\text{N}$   $R_2$  relaxation rates show a more complex profile than would be  
151 expected for a completely disordered chain, indicating other long-range interactions or  
152 hydrophobic clustering are likely to be present (Supplementary Fig. 3).

### 153 **Proline 87 within the degron core of AXR3 exhibits a *cis* and *trans* ratio of 1:1**

154 Within the degron core (residues 85 to 89) the prolyl bond between W86 and P87 is of  
155 particular interest because of its *cis* conformation in the crystal structure of the co-receptor  
156 complex<sup>14</sup> (Fig. 1a). NMR analysis of the AXR3 DI/DII protein shows clear splitting of  
157 resonances for degron residues V84 to R90 arising from the *cis* and *trans* isomers of P87,  
158 but the *cis* linked-states for resonances V84 and V89 are obscured by the overlap of peaks  
159 in the  $^1\text{H}$ - $^{15}\text{N}$  HSQC spectrum (Fig. 1c and 1d). This also affected the *trans*-linked

160 resonances for V84 and R90, which were only distinguished at 4°C and 950 MHz. Therefore,  
161 the populations of the isomer states were determined from the height of the HN cross peaks  
162 associated with G85 and W86 and found to be 49:51, *cis* and *trans* at 16.5°C (Fig. 1c, Fig.  
163 2b and 2c). Even for an X-Pro imide bond with a predicted ratio of 37:63 in a random coil,  
164 this represents a remarkably high proportion of the *cis* isomer, particularly in the context of  
165 the largely disordered nature of this region of the protein.

166 To assess the contribution of closely adjacent degron residues to P87 isomerisation state,  
167 we performed NMR analysis of the N-terminal half of AXR3 bearing the *axr3-3* mutation  
168 (*axr3-3* DI/DII), where V89 is changed to glycine (WPPV to WPPG)<sup>25,26</sup>. This mutation is  
169 part of the *axr3* mutant series that has been well characterised at the whole plant level.  
170 Mutant phenotypes include reductions in plant stature and gravitropic response, and severity  
171 is associated with proximity of the mutated residue to the degron W-P bond, with *axr3-1*  
172 (P88L) being more severe than *axr3-3* (V89G)<sup>25,26</sup>. Consistent with the dominant, gain-of-  
173 function nature of the phenotypes, the *axr3-1* mutation has been shown to abolish interaction  
174 with SCF<sup>TIR1/AFB</sup>, leading to stabilisation and over-accumulation of the protein<sup>11,27</sup>. <sup>1</sup>H-<sup>15</sup>N  
175 HSQC analysis of the *axr3-3* DI/DII protein shows that the valine to glycine substitution at  
176 position 89 shifts the *cis* and *trans* ratio to approximately 1:2, decreasing the amount of the  
177 *cis*-P87 state (Fig. 2b and 2c). These data demonstrate that despite the lack of substantial  
178 stable structure in the vicinity of the degron, adjacent residues contribute to the *cis-trans*  
179 isomerisation of the W86-P87 imide bond.

180

### 181 **Auxin-enhanced binding of the *cis*-P87 conformation to TIR1**

182 The narrow topography of the auxin pocket in TIR1 is expected to dramatically restrict  
183 accommodation of the *trans* conformer, which is not observed in the crystal structure<sup>14</sup>. To  
184 study the impact of *cis* and *trans* degron isomers on auxin co-receptor complex formation we  
185 performed <sup>1</sup>H-<sup>15</sup>N HSQC NMR. AXR3 DI/DII protein, isotopically labelled with <sup>15</sup>N, was

186 assayed with unlabelled TIR1 in the presence or absence of the unlabelled auxin (IAA) (Fig.  
187 3a). Changes in  $^{15}\text{N}/^1\text{H}$  chemical shift, and/or decreases in signal intensity due to line-  
188 broadening are common signs of a molecular interaction in an NMR experiment<sup>28</sup>. Especially  
189 in the case of interactions between an intrinsically disordered protein and a folded protein,  
190 signal intensity decreases and disappearance of signals rather than chemical shift changes  
191 are often observed as a result of the interaction<sup>29</sup>. The degree of line-broadening is  
192 dependent on a number of factors. These include the exchange rate between the free and  
193 receptor bound state, the magnitude of any chemical shift, and the difference in the intrinsic  
194 peak line width between free and bound state ( $T_2$ ). Therefore, for both very strong and very  
195 weak interactions the degree of line broadening is limited, due to the exchange rate being  
196 too slow or too fast respectively. In addition, signal intensity decreases can still be seen  
197 outside of the direct interaction surface as a result of a difference in rotational correlation  
198 time between free and receptor bound protein (Fig. 4a). Consequently, for peaks which were  
199 well resolved and not overlapping within the spectra, decreases in the NMR signal intensity  
200 were used as an indicator of binding.

201 Analysis of the spectra for AXR3 DI/DII protein alone and in complex with both TIR1 and  
202 auxin shows that the intrinsic disorder of AXR3 DI/DII, characterised by the congestion of  
203 signals in a narrow  $^1\text{H}$  chemical shift region, persists during the interaction (Supplementary  
204 Fig. 4) indicating that the ternary auxin co-receptor complex is a dynamic, fuzzy one<sup>22</sup>.  
205 Decreases in NMR peak intensity associated with the addition of TIR1 and IAA show the  
206 degron in DII is the primary binding interface, supported by the adjacent C-terminal region  
207 (Fig. 3a). The G85 and W86 HN cross peaks associated with the *cis* isomer of P87 display  
208 some of the largest changes when IAA is present, leading to the NMR signals no longer  
209 being observed due to broadening (Fig. 3b). It is notable that in the *trans* state of the degron,  
210 these two core residues only show limited engagement with TIR1 in the presence of auxin  
211 (Fig. 3b). These results indicate that *cis*-P87 locks the degron core onto the TIR1 surface  
212 and supports the strongest, auxin-enhanced binding to TIR1, consistent with earlier



213 crystallographic data<sup>14</sup>. Further, our NMR analysis show that the binding interface extends  
214 beyond the peptide sequence used in these crystallographic studies (ending at K94)<sup>14</sup>. We  
215 observed changes in signal intensity to residue Q101 at the C-terminus of AXR3 DI/DII.  
216 Even at this distal location, auxin enhances AXR3 binding to TIR1 (Fig. 3a). Thus, the  
217 binding interface between the two proteins is likely to extend well into the central cavity of  
218 the solenoid of LRRs on the TIR1 surface (Fig. 1a; Tan *et al.*, 2007<sup>14</sup>), a finding that is  
219 consistent with previous studies in yeast showing that the region C-terminal to the degron in  
220 several Aux/IAAs is important for their instability<sup>30</sup>.

221

222 **Auxin-dependent binding of the *trans* degron to TIR1 and the synthetic auxin**  
223 **molecule cvxIAA reveal intermediate stages of co-receptor complex formation**

224 In addition to the ternary co-receptor complex, we also observed decreases in NMR signal  
225 intensity in spectra obtained with only AXR3 DI/DII and TIR1. This is particularly evident in  
226 the C-terminal half of the *trans* degron (Fig. 3a, top and 3b). This region includes S91, where  
227 the signal intensity decreases to such an extent that the resonance is no longer detected,  
228 indicating the existence of auxin-independent association between AXR3 DI/DII and TIR1  
229 (Fig. 3a).

230 Intriguingly, auxin-dependent binding between the *trans*-P87 degron conformer and TIR1 is  
231 detected for residues V84, V89, and R90 (Fig. 3b). These interactions are particularly  
232 interesting because the profound difference in the conformation of the *trans*-P87 degron and  
233 confines of the TIR1 auxin binding pocket preclude the canonical molecular glue mode of  
234 auxin activity<sup>14</sup>. These data therefore indicate formation of a ternary Aux/IAA-auxin-TIR1  
235 complex away from the base of the pocket. Whether or not the auxin-induced binding of  
236 *trans*-P87 degron conformers to TIR1 is in itself of direct physiological relevance in auxin  
237 perception is unclear. One explanation for the observation is that the *trans*-P87  
238 conformation, which cannot proceed to the fully-assembled complex defined by

239 crystallographic analysis, reveals an auxin-dependent and topologically-distinct intermediate  
240 binding event common to both *trans* and *cis* degron conformations. In the case of the latter,  
241 this intermediate state is less readily detectable in the latter because of the rapid progression  
242 of *cis* degron conformers to the fully-docked state. To test this idea we performed  $^1\text{H}$ - $^{15}\text{N}$   
243 HSQC NMR experiments using the auxin analogue 5-(3-methoxyphenyl)-indole-3-acetic acid  
244 (cvxIAA)<sup>31</sup>. This synthetic auxin, which is unable to dock at the base of the binding pocket in  
245 wild-type TIR1, only elicits auxin effects *in planta* in the presence of a TIR1 derivative  
246 modified to accommodate the methoxyphenyl side-group (ccvTIR1)<sup>31</sup>. cvxIAA thus provides  
247 a tool to study putative auxin-enhanced interactions occurring before the co-receptor  
248 complex is fully docked<sup>32</sup>.

249 Decreases in NMR peak intensity associated with the addition of TIR1 and cvxIAA were  
250 similar to the binding profile observed with IAA, but with larger changes to peak intensity  
251 (Fig. 3a). While a larger effect of cvxIAA relative to IAA may seem counter-intuitive, the more  
252 pronounced line-broadening with cvxIAA is consistent with the NMR behaviour of an  
253 interaction with an intermediately-fast binding exchange rate relative to the more stable  
254 interaction promoted by IAA (Fig. 4a). Indeed, Surface Plasmon Resonance (SPR) analysis  
255 of the receptor complex formation with cvxIAA shows much faster dissociation and an almost  
256 10-fold decrease in affinity compared to IAA (Fig. 4b,c Supplementary Table 3). Importantly,  
257 cvxIAA promotes the binding of both conformers of the degron. This was particularly clear for  
258 the *cis* degron core, with the loss of signals for the HN cross peaks of G85 and W86, in  
259 contrast to the TIR1 only control (Fig. 3b). These results show that a binding event occurs  
260 between AXR3 DI/DII and TIR1, enhanced by cvxIAA, before the degron core is fully  
261 docked. These data, together with the observation of auxin (IAA)-dependent binding of  
262 *trans*-P87 AXR3 DI/DII to TIR1 indicate the existence of an encounter complex that, in terms  
263 of the spatial arrangement of the interacting co-receptor components, is topologically distinct  
264 from the fully-docked co-receptor complex observed by X-ray crystallography<sup>14</sup> (Fig. 4d).

265

## 266 Discussion

267 The data presented here have revealed the early events of auxin perception via TIR1/AFB  
268 and Aux/IAA co-receptor proteins. Central to this is the experimental demonstration of  
269 extensive intrinsic disorder in the DI/DII half of AXR3, consistent with previous bioinformatic  
270 predictions<sup>21</sup>. The local secondary structure propensity assignments for AXR3 reported here  
271 are supported by the report of  $\alpha$ -helical structure for an IAA27 EAR motif peptide bound to  
272 the Arabidopsis TOPLESS protein<sup>8</sup> (PDB code 5NQV) and helical configurations reported for  
273 peptides *At*IAA1 and *At*IAA10 peptides bound to rice TOPLESS-related protein 2<sup>7</sup>.

274 The intrinsically disordered region of AXR3 forms an auxin co-receptor complex primarily via  
275 the degron. This binding motif is surrounded by a cluster of weak  $\beta$ -secondary structure and  
276 the transient formation of such elements has previously been shown to have the potential to  
277 modulate the molecular interaction<sup>33</sup>. Together with the demonstration of auxin-independent  
278 and crucially, auxin-dependent AXR3-TIR1 binding events occurring away from the base of  
279 the auxin binding pocket in TIR1, we propose a model in which the C-terminal half of the  
280 degron and adjacent non-degron motifs initiate an encounter complex with its co-receptor,  
281 enhancing the likelihood of an active ternary complex being formed (Fig. 4d). The initial  
282 stages of this process are supported by evidence of auxin-independent association of the  
283 AXR3 proteins to TIR1, mediated predominantly through the C-terminal half of the degron  
284 and possibly driven by the electrostatic field of the InsP<sub>6</sub> co-factor<sup>14</sup>. This evidence of auxin-  
285 independent association is consistent with previous pull-down assays using full-length  
286 Aux/IAA proteins<sup>12,13</sup>, native polyacrylamide gel electrophoresis<sup>14</sup>, and yeast two-hybrid  
287 assays<sup>34</sup>.

288 The auxin-independent association of Aux/IAA and TIR1 is likely to increase the probability  
289 of the degron core coming into close proximity to the entrance of the auxin binding pocket  
290 (Fig. 4d). In this configuration and with the inherent conformational flexibility of the region

291 surrounding the degron, we speculate that the hydrophobic cluster of the degron core  
292 (VVGWPPV) may be primed for auxin to trigger the central degron to interact with TIR1,  
293 enhancing the transition of both auxin and the Aux/IAA degron further into the auxin binding  
294 pocket and into the positions as captured in the crystal structure<sup>14</sup>. The discovery of  
295 encounter complex interactions between TIR1, auxin, and AXR3 does not preclude less  
296 sophisticated modes of auxin perception in which auxin and the Aux/IAA co-receptor bind  
297 sequentially and independently to TIR1. Rather they add to the set of distinct molecular  
298 interaction events within which specificity in auxin signalling can arise<sup>2,34,35</sup>. Thus, the  
299 capacity for a small molecule to act as a potent auxin in promoting receptor complex  
300 formation is not limited to its ability to navigate to, and occupy the base of the auxin binding  
301 pocket in TIR1. Similarly, the intrinsic instability of an Aux/IAA is not dependent solely on its  
302 ability to occupy the space above auxin when bound at the bottom of that same pocket.

303 An intriguing observation of this work on AXR3 is that P87 shows approximately equal  
304 occupancy of the *cis* and *trans* conformations, without catalysis, observed through the  
305 splitting of the W86 and G85 HN cross peaks. This very high proportion of *cis* conformer is  
306 perhaps all the more remarkable given the paucity of substantial structure in the region of  
307 the degron. Nevertheless, the finding that mutation of the adjacent degron residue V89  
308 dramatically reduces the *cis:trans* ratio from 1:1 to 1:2 indicates that the local environment of  
309 the degron contributes to the propensity to adopt the *cis* conformation. Previous work with  
310 degron peptides for the rice Aux/IAA, OsIAA11 reported a *cis* population of 36%<sup>19</sup>. That work  
311 identified a *cis-trans* isomerase, LRT2, which is proposed to be required to promote  
312 conversion between the two conformers<sup>19,20</sup>. Recently, it has been shown that catalysis of  
313 W-P bond of the OsIAA11 degron is intrinsically slow, regardless of which isomerases are  
314 used<sup>36</sup>. Indeed, the isomerisation rate without catalysis for a typical W-P bond is  $5 \times 10^{-4} \text{ s}^{-1}$   
315 for *cis* to *trans*, and  $3 \times 10^{-4} \text{ s}^{-1}$  for *trans* to *cis* at 4 °C<sup>16</sup>. With this in mind, no such isomerase  
316 has as yet been identified for Arabidopsis, but the possibility remains that there may be more  
317 to the function of TIR1 than previously thought.

318 By studying one of the most pivotal molecular interaction events in plant development, we  
319 have drawn attention to the interplay between plant hormones and intrinsically disordered  
320 proteins. These findings have identified new steps and new complexity in the formation of  
321 the Aux/IAA-TIR1 co-receptor complex involving at least two distinct auxin-dependent  
322 interaction events in addition to their auxin-independent association. Protein partners that  
323 retain elements of intrinsic disorder in one or more of their constituent parts upon complex  
324 formation, as in the case of AXR3 and TIR1, have been described as fuzzy<sup>22</sup>. In the case of  
325 TIR1-based auxin perception an interesting question arises as to whether the nanomolar  
326 affinity of the ternary co-receptor complex<sup>12,13,37</sup> is remarkable despite the persistent intrinsic  
327 disorder of the Aux/IAA or because of it. In addition to providing the multivalency to support  
328 the formation of complexes involving multiple steps and binding surfaces, there is a growing  
329 body of work highlighting the crucial role that intrinsically disordered protein regions can play  
330 in tuning protein function<sup>23,38,39,40</sup>. For example, it has recently been shown that the  
331 intrinsically disordered tail of human UDP- $\alpha$ -d-glucose-6-dehydrogenase (UGDH) can alter  
332 the conformation and activity of the protein via the entropic force arising simply from  
333 constraint of an unfolded peptide against folded protein domains<sup>39</sup>. The entropic force  
334 generated was shown to be proportional to the length of the intrinsically disordered region  
335 and independent of amino acid sequence *per se*<sup>39</sup>. In the case of Aux/IAAs, it has been  
336 shown that truncations of AXR3/IAA17 that retain the sequences immediately C-terminal to  
337 the degron shown to interact with TIR1 (Fig. 3) but remove portions of the intrinsically  
338 disordered regions N-terminal to the degron increase protein half-life in an *in vivo* yeast  
339 system<sup>30</sup>. Further work will be required to establish the extent to which the inherent dynamic  
340 switching of conformational states of the intrinsically disordered regions of AXR3 contributes  
341 to either or both the high propensity for the *cis*-P87 degron form and the formation of  
342 Aux/IAA-auxin-TIR1 encounter complex and subsequent progression to the fully-docked co-  
343 receptor architecture. In addition, the new insights into the auxin co-receptor complex  
344 formation described here provide a framework to better understand the mode of action and  
345 species selectivity of current auxinic herbicides as well as highlighting the potential for the

346 development of more selective and potent herbicides based on the regulation of a fuzzy  
347 auxin co-receptor complex.

348

## 349 **Methods**

### 350 **Protein preparation**

351 The N-terminal half DI/DII of AXR3, and axr3-3 were expressed as 6X His-tag (N-terminal)  
352 fusion proteins in *Escherichia coli* strain Rosetta™ DE3 competent cells (Supplementary  
353 Table 4; Novagen, product code: 70954). These proteins were expressed in minimal media  
354 with <sup>13</sup>C D-glucose and <sup>15</sup>N ammonium chloride. The maximisation of isotope labelling of the  
355 expressed protein involved a 125-fold dilution of cell culture in enriched growth media into  
356 minimal media with <sup>13</sup>C D-glucose and <sup>15</sup>N ammonium chloride and grown for 16 hours  
357 (37°C / 200 rpm); followed by a further 40-fold dilution into minimal media for the final period  
358 of cell growth and protein expression (induced with 0.5 mM IPTG / 18°C / 200 rpm and  
359 grown for a further 12 hours). The fusion protein was isolated from soluble cell lysate by Co-  
360 NTA affinity chromatography and the protein eluted on a gradient of increasing imidazole  
361 concentration. Chromatography buffers contained 20 mM sodium phosphate, pH 8.0, 500  
362 mM NaCl and either 10 mM or 500 mM imidazole for wash and elution buffers respectively.  
363 For preparation of unlabelled Arabidopsis TIR1, expression constructs were engineered into  
364 the pOET5 transfer vector (Oxford Expression Technologies) to allow coexpression of the  
365 fusion proteins His10-eGFP-FLAG-(TEV)-AtTIR1 and His10-(TEV)-AtASK1 (pOET5 AtTIR1  
366 AtASK1, Supplementary Fig. 5) in a baculovirus vector system in *Spodoptera frugiperda*  
367 (Sf9) insect cells and purified as previously described<sup>34</sup> with the following modifications.  
368 Soluble cell lysate was passed through a HiTrap 1 mL TALON Crude column, followed by a  
369 column of ANTI-FLAG® M2 affinity gel (Sigma-Aldrich, product code: A2220) with the sample  
370 in a buffer containing 1 mM DTT, 150 mM NaCl and 10 mM HEPES pH 7.4 and eluted with  
371 100 µg ml<sup>-1</sup> 3xFLAG peptide (Sigma).

## 372 **NMR spectroscopy**

373 All protein samples for NMR analysis were concentrated by ultrafiltration and underwent  
374 buffer exchange into 20 mM sodium phosphate pH 6.0, 150 mM NaCl, 3 mM EDTA, 10 mM  
375 DTT, cOmplete mini protease inhibitor cocktail (2% v/v; Roche Molecular Biochemicals).  
376 Before NMR analysis D<sub>2</sub>O (5% to 10% v/v depending on frequency of spectrometer) was  
377 added to the sample. The parameters for the <sup>1</sup>H-<sup>15</sup>N Heteronuclear Single-Quantum  
378 Correlation (HSQC) experiment are described in Supplementary Table 5.

## 379 **NMR analysis of the auxin co-receptor complex**

380 In our system, the NMR experiments had to be conducted with 5-10 μM TIR1 protein at 4°C  
381 and were completed within 18 hours from finishing the purification. <sup>15</sup>N isotopically-labelled  
382 AXR3 DI/DII protein and unlabelled TIR1 protein was prepared in a 1:3 ratio with 5% D<sub>2</sub>O  
383 and measured using a <sup>1</sup>H-<sup>15</sup>N HSQC experiment following the parameters described in  
384 Supplementary Table 5. The full auxin co-receptor complex was studied by the addition of  
385 200 μM auxin (unlabelled) to the sample. The NMR experiments were initiated with fresh  
386 TIR1 and completed within 18 hours of finishing the TIR1 purification.

## 387 **NMR backbone assignment**

388 The following NMR experiments were used in the assignment of the backbone of AXR3  
389 DI/DII: HNCA, HNcoCA, HNcaCB, CBcacoNH, HNcaCO, HNCO using <sup>13</sup>C, <sup>15</sup>N isotopically-  
390 labelled protein (290 μM). The parameters for are described in Supplementary Table 1. All  
391 the assignment experiments were performed at 600 MHz at 16.5°C using an Agilent DDX3  
392 NMR spectrometer with a RT HCN triple resonance probe. The assignment data were  
393 analysed with minimal automation in the software CcpNmr Analysis.

## 394 **Sequential NMR backbone assignment through the prolines in the AXR3 DI/DII protein**

395 A set of 2D <sup>13</sup>CO detected NMR experiments CON, hCANCO, and hCACO were used in the  
396 assignment of prolines in the carbon backbone of AXR3 DI/DII. The parameters for the NMR



397 experiments are described in Supplementary Table 2. The experiments were performed at  
398 950 MHz at 16.5°C using a TCI cryoprobe with a cooled amplifier on carbon.

### 399 **Identifying and estimating the occupancy of the *cis* and *trans* isomer populations**

400 The  $^{13}\text{C}_\alpha$  *cis* Pro population was predicted to have an up-field chemical shift of around 0.5  
401 ppm<sup>41,42</sup>. The hCAnCO and hCACO spectra for AXR3 DI/DII show an up-field  $^{13}\text{C}_\alpha$  chemical  
402 shift difference of around 0.3 ppm for the *cis* isomer population of P87 compared to the *trans*  
403 isomer position. The height and volume of NMR signals assigned to G85 and W86 were  
404 determined automatically from the assignment peak list for the  $^1\text{H}$ - $^{15}\text{N}$  HSQC spectrum within  
405 the software CcpNmr Analysis using the peak picking option. The height of the NMR signals  
406 was measured by a parabolic method. The NMR experiments were performed at least 12  
407 hours after purification.

### 408 **$^{15}\text{N}$ $R_2$ relaxation of AXR3 DI/DII**

409 A  $^{15}\text{N}$   $R_2$  relaxation experiment was performed at 16.5°C and at 950 MHz following the  
410 parameters in Supplementary Table 6. Ten values of the  $R_2$  relaxation delay (S) were used,  
411 including two repeat values and recorded in a random order of 0.06, 0.39, 0.84, 0.26, 0.64,  
412 0.13, 0.52, 0.26, 1.03, 0.64.

### 413 **Surface plasmon resonance**

414 Streptavidin sensor chips (GE Healthcare Life Sciences) were used in all SPR assays and  
415 prepared with AXR2 degron peptide (IAA7: biot-AKAQVVGWPPVRNYRKN) and mutated  
416 AXR2 peptide (mIAA7: biot- AKAQVVEWSSGRNYRKN) as previously described<sup>34</sup>, using  
417 HBS-EP buffer (GE Healthcare Life Sciences) and a Biacore T200. TIR1 for these  
418 experiments was prepared as detailed above except that TIR1 protein was eluted with 100  
419  $\mu\text{g ml}^{-1}$  3xFLAG peptide in 10 mM HEPES pH7.4, 150 mM NaCl, 3 mM EDTA, 1 mM TCEP,  
420 0.05% Tween 20. Each SPR experiment consisted of at least 1 minute buffer baseline at a  
421 flow rate of 20-25  $\mu\text{L}$  / minute followed by a 4 minute injection of 50  $\mu\text{M}$  auxin with TIR1  
422 protein in HBS-EP buffer (indicative protein concentration 1.75  $\mu\text{M}$ , determined by UV



423 absorbance at  $A_{280}$ ). A dose series of each auxin (IAA or cvxIAA) was injected over the  
424 AXR2 (IAA7) peptide<sup>34</sup>. A series of 8 auxin concentrations was run, with two being  
425 duplicated. A control with solvent (1% DMSO final, as for all auxin treatments) was used for  
426 a double subtraction baseline. All sensorgrams represent data for channel 2-1, with 4x  
427 mutated AXR2 (mIAA7) on channel 1<sup>34</sup>.

428

## 429 **Acknowledgements**

430 We thank Professor Sheena Radford FMedSci FRS for critical reading of the manuscript. We  
431 also thank Dr John Paul Evans and Dr Nathan Kidley for their support throughout the project.  
432 We acknowledge the NMR facility for access to the 950 MHz and 600 MHz spectrometers  
433 funded by the University of Leeds and the 750 MHz spectrometer funded by the Wellcome  
434 Trust (Award Reference: 094232). SPR was performed at the Wellcome Trust-supported  
435 Biomolecular Interactions facility in the Astbury Centre, Faculty of Biological Sciences,  
436 University of Leeds (Award Reference: 062164/Z/00/Z) and at the University of Warwick  
437 Synthetic Biology Research Centre (Award Reference: BB/M017982/1). This research was  
438 funded by grants from the Biotechnology and Biological Sciences Research Council (Award  
439 references: BB/L010623/1 to S.K. and R.N., and BB/I532402/1 to S.R.H.) and Syngenta UK  
440 (Award Reference: 1232512 to S.K. & S.R.H.). M.K.<sup>3</sup> was supported by the EU MSCA-IF  
441 project CrysPINs (792329).

442

## 443 **References**

444 1. Hayashi, K. *et al.* The interaction and integration of auxin signaling components.  
445 *Plant and Cell Physiology* **53**, 965-975 (2012).

- 446 2. Wang, R. and Estelle, M. Diversity and specificity: auxin perception and signaling  
447 through the TIR1/AFB pathway. *Current Opinion in Plant Biology* **21**, 51-58  
448 (2014).
- 449 3. Dinesh, D. C. *et al.* Solution structure of the PsIAA4 oligomerization domain  
450 reveals interaction modes for transcription factors in early auxin response.  
451 *Proceedings of the National Academy of Sciences* **112**, 6230-6235 (2015).
- 452 4. Guilfoyle, T. J. and Hagen, G. Auxin response factors. *Current Opinion in Plant*  
453 *Biology* **10**, 453-460 (2007).
- 454 5. Chandler, J. W. Auxin response factors. *Plant, Cell & Environment* **39**, 1014-1028  
455 (2016).
- 456 6. Szemenyei, H. *et al.* TOPLESS mediates auxin-dependent transcriptional  
457 repression during Arabidopsis embryogenesis. *Science* **319**, 1384-1386 (2008).
- 458 7. Ke, J. *et al.* Structural basis for recognition of diverse transcriptional repressors  
459 by the TOPLESS family of corepressors. *Science Advances* **1**, e1500107-  
460 e1500107 (2015).
- 461 8. Martin-Arevalillo, R. *et al.* Structure of the Arabidopsis TOPLESS corepressor  
462 provides insight into the evolution of transcriptional repression. *Proceedings of*  
463 *the National Academy of Sciences* **114**, 8107-8112 (2017).
- 464 9. Boer, D. R. *et al.* Structural basis for DNA binding specificity by the auxin-  
465 dependent ARF transcription factors. *Cell* **156**, 577-589 (2014).
- 466 10. Han, M. *et al.* Structural basis for the auxin-induced transcriptional regulation by  
467 Aux/IAA17." *Proceedings of the National Academy of Sciences* **111**, 18613-  
468 18618 (2014).
- 469 11. Ramos, J. A. *et al.* Rapid degradation of auxin/indoleacetic acid proteins requires  
470 conserved amino acids of domain II and is proteasome dependent. *The Plant Cell*  
471 **13**, 2349-2360 (2001).
- 472 12. Dharmasiri, N. *et al.* The F-box protein TIR1 is an auxin receptor. *Nature* **435**,  
473 441-445 (2005).

- 474 13. Kepinski, S. and Leyser, O. The Arabidopsis F-box protein TIR1 is an auxin  
475 receptor. *Nature* **435**, 446-451 (2005).
- 476 14. Tan, X. *et al.* Mechanism of auxin perception by the TIR1 ubiquitin ligase. *Nature*  
477 **446**, 640–645 (2007).
- 478 15. Lu, K. P., Finn, G., Lee, T. H. & Nicholson, L. K. Prolyl cis-trans isomerization as  
479 a molecular timer. *Nature Chemical Biology* **3**, 619-629 (2007).
- 480 16. Reimer, U. *et al.* Side-chain effects on peptidyl-prolyl cis/trans isomerisation.  
481 *Journal of Molecular Biology* **279**, 449-460 (1998).
- 482 17. Wu, W. J. & Raleigh, D. P. Local control of peptide conformation: stabilization of  
483 cis proline peptide bonds by aromatic proline interactions. *Biopolymers* **45**, 381–  
484 394 (1998).
- 485 18. Dasgupta, B. *et al.* Enhanced stability of cis Pro-Pro peptide bond in Pro-Pro-Phe  
486 sequence motif. *FEBS Letters* **581**, 4529–4532 (2007).
- 487 19. Jing, H. *et al.* Peptidyl-prolyl isomerization targets rice Aux/IAAs for proteasomal  
488 degradation during auxin signalling. *Nature Communications* **6**, 7395–7405  
489 (2015).
- 490 20. Acevedo, L. A., Kwon, J., & Nicholson, L. K. Quantification of reaction cycle  
491 parameters for an essential molecular switch in an auxin-responsive transcription  
492 circuit in rice. *Proceedings of the National Academy of Sciences* **116**, 2589-2594  
493 (2019).
- 494 21. Winkler, M. *et al.* Variation in auxin sensing guides AUX/IAA transcriptional  
495 repressor ubiquitylation and destruction. *Nature Communications* **8**, 15706–  
496 15719 (2017).
- 497 22. Tompa, P., and Fuxreiter, M. Fuzzy complexes: polymorphism and structural  
498 disorder in protein-protein interactions. *Trends in Biochemical Sciences* **33**, 2-8  
499 (2008).

- 500 23. Wright, P. E., and Dyson, H. J. Intrinsically disordered proteins in cellular  
501 signalling and regulation. *Nature Reviews Molecular Cell Biology* **16**, 18-  
502 29 (2015).
- 503 24. Kashtanov S., Borchers W., Wu H., Daughdrill G.W., Ytreberg F.M. Using  
504 Chemical Shifts to Assess Transient Secondary Structure and Generate  
505 Ensemble Structures of Intrinsically Disordered Proteins. In: Uversky V.,  
506 Dunker A. (eds) *Intrinsically Disordered Protein Analysis. Methods in*  
507 *Molecular Biology (Methods and Protocols)* **895**, 139-152 (Humana Press,  
508 Totowa, NJ, 2012).
- 509 25. Leyser, O. *et al.* Mutations in the AXR3 gene of Arabidopsis result in altered  
510 auxin response including ectopic expression from the SAUR-AC1 promoter. *The*  
511 *Plant Journal* **10**, 403–413 (1996).
- 512 26. Rouse, D. *et al.* Changes in auxin response from mutations in an AUX/IAA gene.  
513 *Science* **279**, 1371–1373 (1998).
- 514 27. Gray, W. M. *et al.*, Auxin regulates SCF<sup>TIR1</sup>-dependent degradation of Aux/IAA  
515 proteins. *Nature* **414**, 271-276 (2001).
- 516 28. Pellecchia, M. *et al.* NMR in drug discovery. *Nature Reviews* **1**, 211-219 (2002).
- 517 29. Schneider, R., Blackledge, M., & Jensen, M. R. Elucidating binding mechanisms  
518 and dynamics of intrinsically disordered protein complexes using NMR  
519 spectroscopy. *Current Opinion in Structural Biology* **54**, 10-18.
- 520 30. Moss, B. L. *et al.* Rate motifs tune auxin/indole-3-acetic acid degradation  
521 dynamics. *Plant Physiology* **169**, 803-813 (2015).
- 522 31. Uchida, N., *et al.* Chemical hijacking of auxin signalling with an engineered auxin-  
523 TIR1 pair. *Nature Chemical Biology* **14**, 299-305 (2018).
- 524 32. Uzunova, V. V. *et al.* Tomographic docking suggests the mechanism of auxin  
525 receptor TIR1 selectivity. *Open Biology* **6**, 160139–160149 (2016).
- 526 33. Fuxreiter, M. Fold or not to fold upon binding – does it really matter? *Current*  
527 *Opinion in Structural Biology* **54**, 19-25 (2019).

- 528 34. Lee, S. *et al.* Defining binding efficiency and specificity of auxins for  
529 SCF(TIR1/AFB)-Aux/IAA co-receptor complex formation. *ACS Chemical Biology*  
530 **21**, 673-82 (2014).
- 531 35. Weijers, D. and Wagner, D. Transcriptional responses to the auxin hormone.  
532 *Ann. Rev. Plant Biol.* **67**, 539-574 (2016).
- 533 36. Acevedo, L. A. *et al.*, Tuning a timing device that regulates lateral root  
534 development in rice. *Journal of Biomolecular NMR*  
535 <https://doi.org/10.1007/s10858-019-00258-0> (2019).
- 536 37. Calderón Villalobos, L. I. *et al.* A combinatorial TIR1/AFB-Aux/IAA co-receptor  
537 system for differential sensing of auxin. *Nature Chemical Biology* **8**, 477-485  
538 (2012).
- 539 38. Ferreon, A. C. M., Ferreon, J. C., Wright, P. E. & Deniz, A. A. Modulation of  
540 allostery by protein intrinsic disorder. *Nature* **498**, 390-394 (2013).
- 541 39. Keul, N. D. *et al.* The entropic force generated by intrinsically disordered  
542 segments tunes protein function. *Nature* **563**, 584-588 (2018).
- 543 40. Uversky, V. N. Intrinsically disordered proteins and their “mysterious”  
544 (meta)physics. *Frontiers in Physics* **7**, doi:10.3389/fphy.2019.00010 (2019).
- 545 41. Richarz, R. & Wüthrich, K. Carbon-13 NMR chemical shifts of the common amino  
546 acid residues measured in aqueous solutions of the linear tetrapeptides H-Gly-  
547 Gly-X-L-Ala-OH. *Biopolymers* **17**, 2133-2141(1978).
- 548 42. Shen, Y. & Bax, A. Prediction of Xaa-Pro peptide bond conformation from  
549 sequence and chemical shifts. *Journal of Biomolecular NMR* **46**, 199-204 (2010).

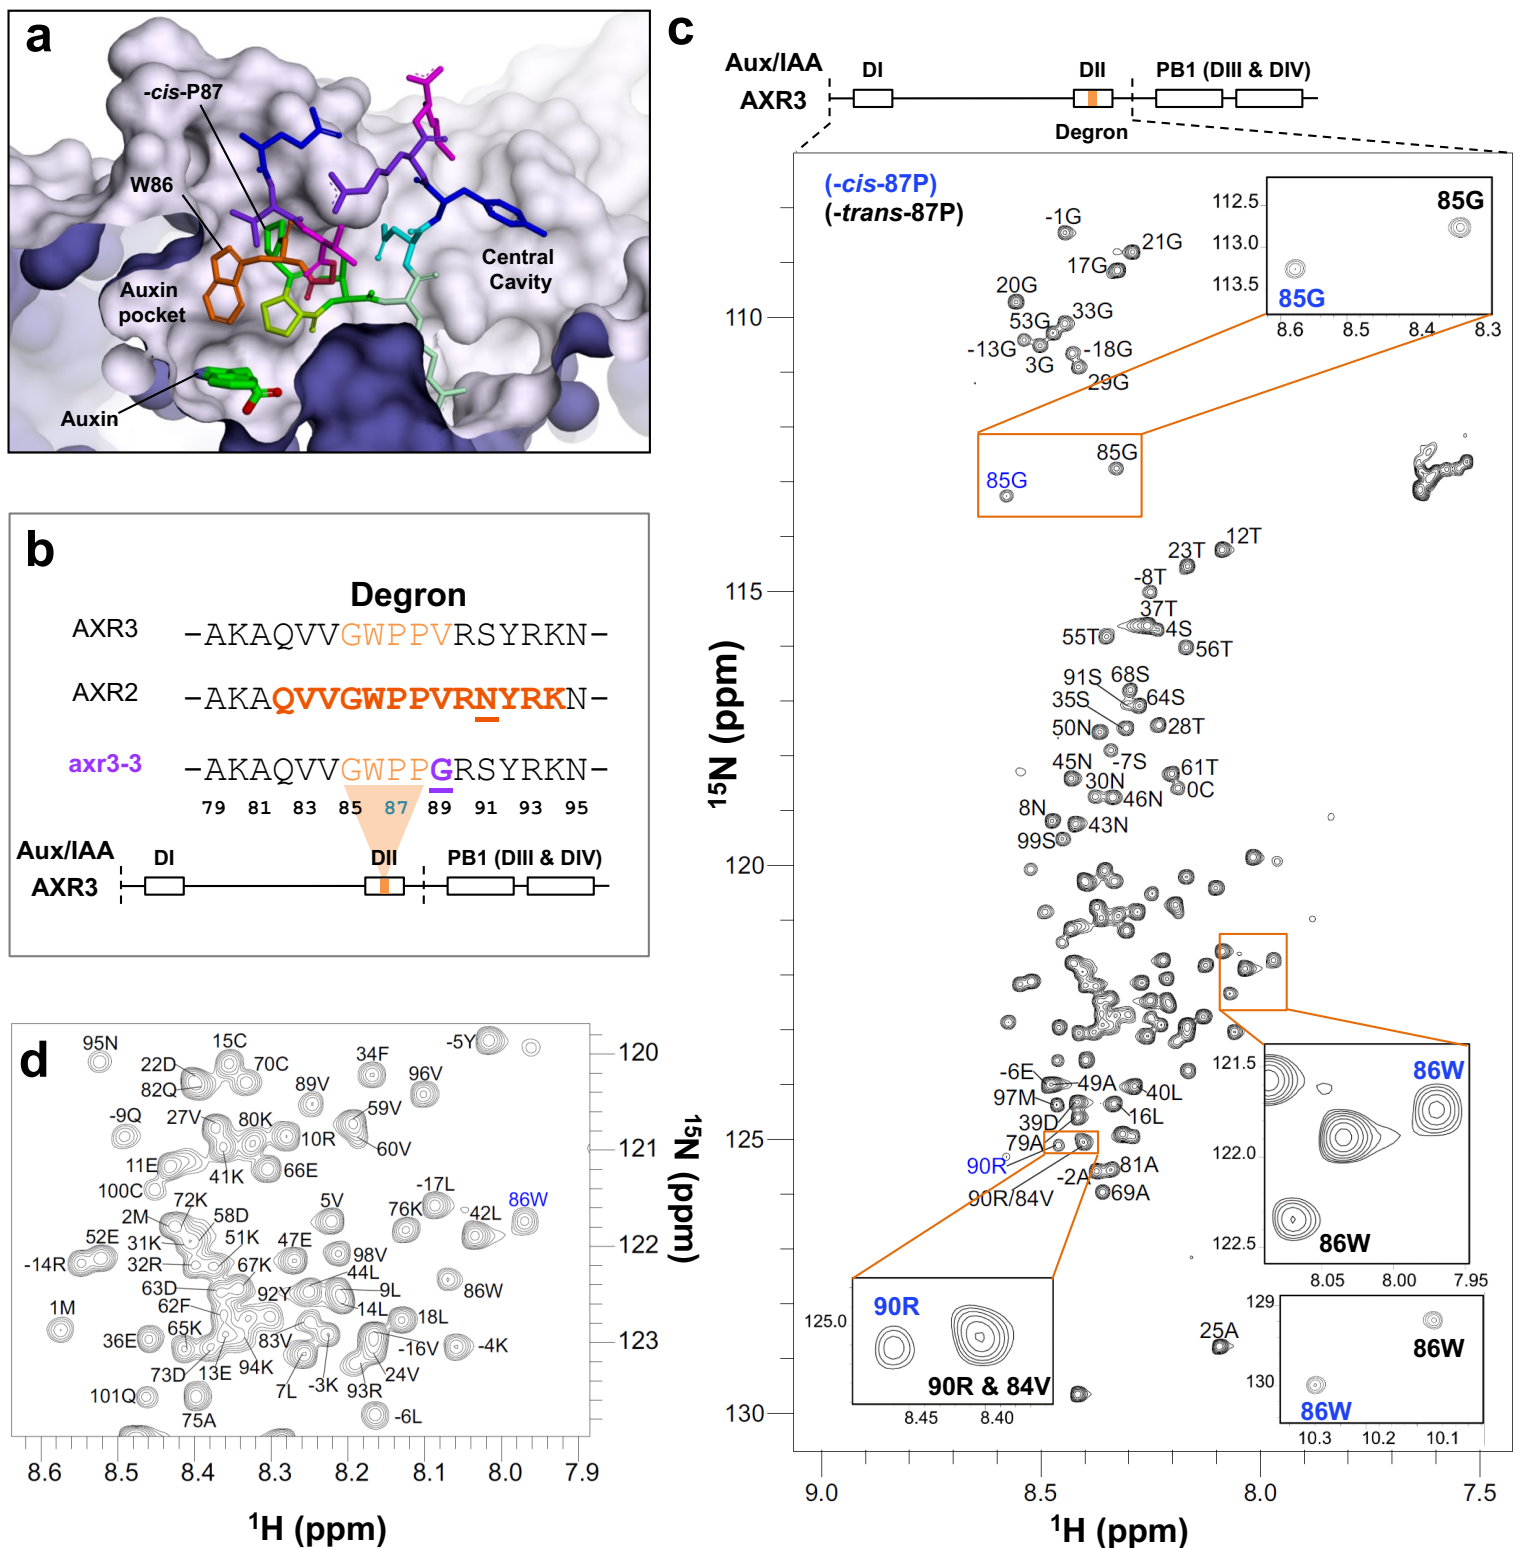

**Figure 1 | Overview of the Aux/IAA degnon and the intrinsic disorder of AXR3 DI/DII.** (a) Structure of IAA7/AXR2 degnon (*cis*-P87) bound to TIR1 and auxin, showing the two TIR1 cavities based on 2P1Q (Tan *et al.*, 2007). (b) Amino acid sequences of DII from different Aux/IAA proteins with polymorphisms highlighted in bold and underlined. Core residues are in orange, and the mutated residue in *axr3-3* is shown in purple. The AXR2 sequence highlighted and in bold indicates the peptide crystallised by Tan *et al.*, 2007<sup>14</sup>. Below the sequence alignment is a schematic of the AXR3 protein showing the four domains. The location of the degnon is highlighted, and the dashed line indicates the DI/DII region of the protein studied by NMR (c) <sup>1</sup>H-<sup>15</sup>N HSQC spectrum of the protein AXR3 DI/DII at 16.5 °C. The peaks associated with P87 in the *cis* isomer conformation are annotated light-blue. (d) An enlarged image of the signal dense region of the HSQC spectrum.



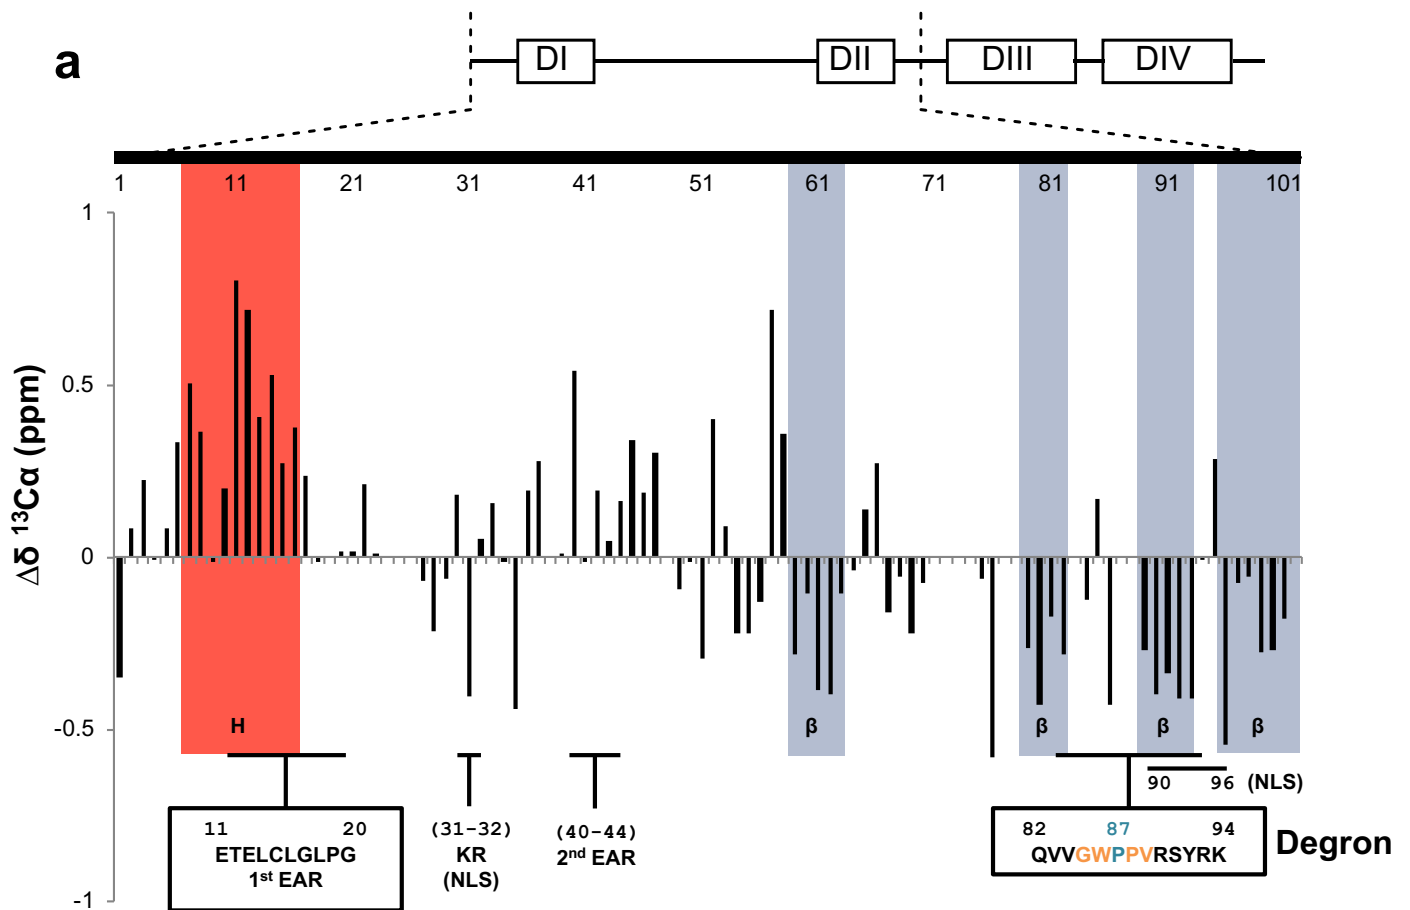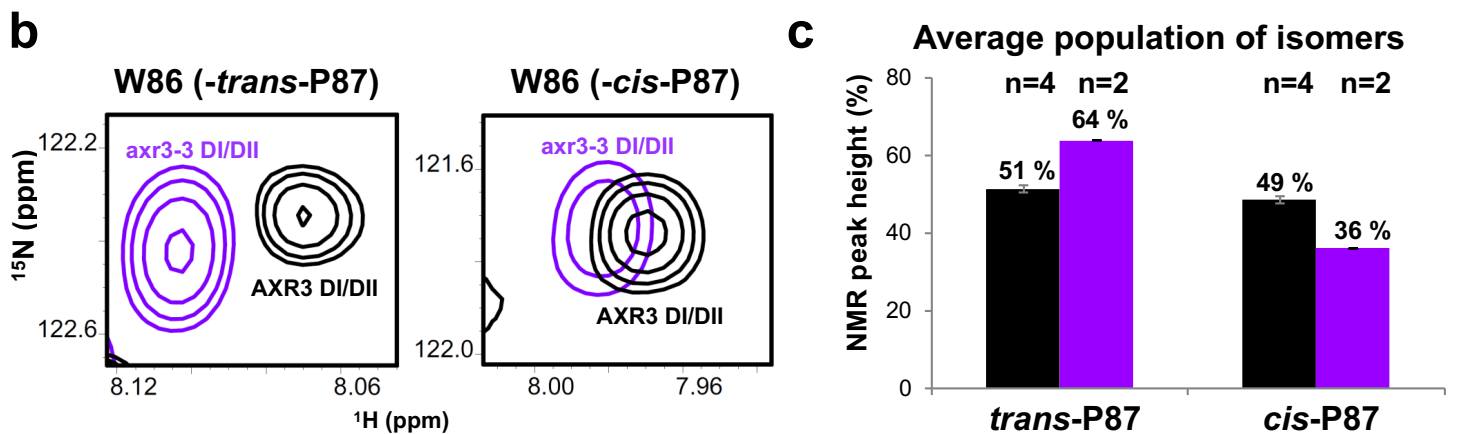

**Figure 2 | Proline 87 within the degron core of AXR3 exhibits a high *cis:trans* ratio despite the lack of substantial stable structure in the vicinity of the degron. (a)** The chemical shift index for  $^{13}\text{C}_\alpha$  signals assigned to residues along the carbon backbone of AXR3 DI/DII. Positive chemical shift differences ( $\Delta\delta$ ) indicate a tendency for helical secondary structure. Negative  $\Delta\delta$  indicate a tendency for  $\beta$ -secondary structure. Consensus regions for secondary structure tendencies between the  $\Delta\delta$ ,  $^{13}\text{C}_\alpha$ , and  $^{13}\text{C}'$  indexes are highlighted red and grey, for the helical and  $\beta$ -secondary structure respectively (Supplementary Fig. 2). The data are overlaid with a schematic diagram of the AXR3 protein, indicating the N-terminal DI and DII. Important binding interfaces include the EAR motifs for the recruitment of TPL. The two nuclear localisation signals (NLS) are also indicated. **(b)** HN cross peaks associated with W86 in AXR3 DI/DII compared to *axr3-3* DI/DII. **(c)** The *cis* and *trans* isomer populations determined from the HN cross peak heights recorded for the G85 and W86 signals in *axr3-3* DI/DII and AXR3 DI/DII. In each study the mean is calculated and  $n$  = number of independent studies. The overall mean of means is shown and the error bars display the standard deviation.

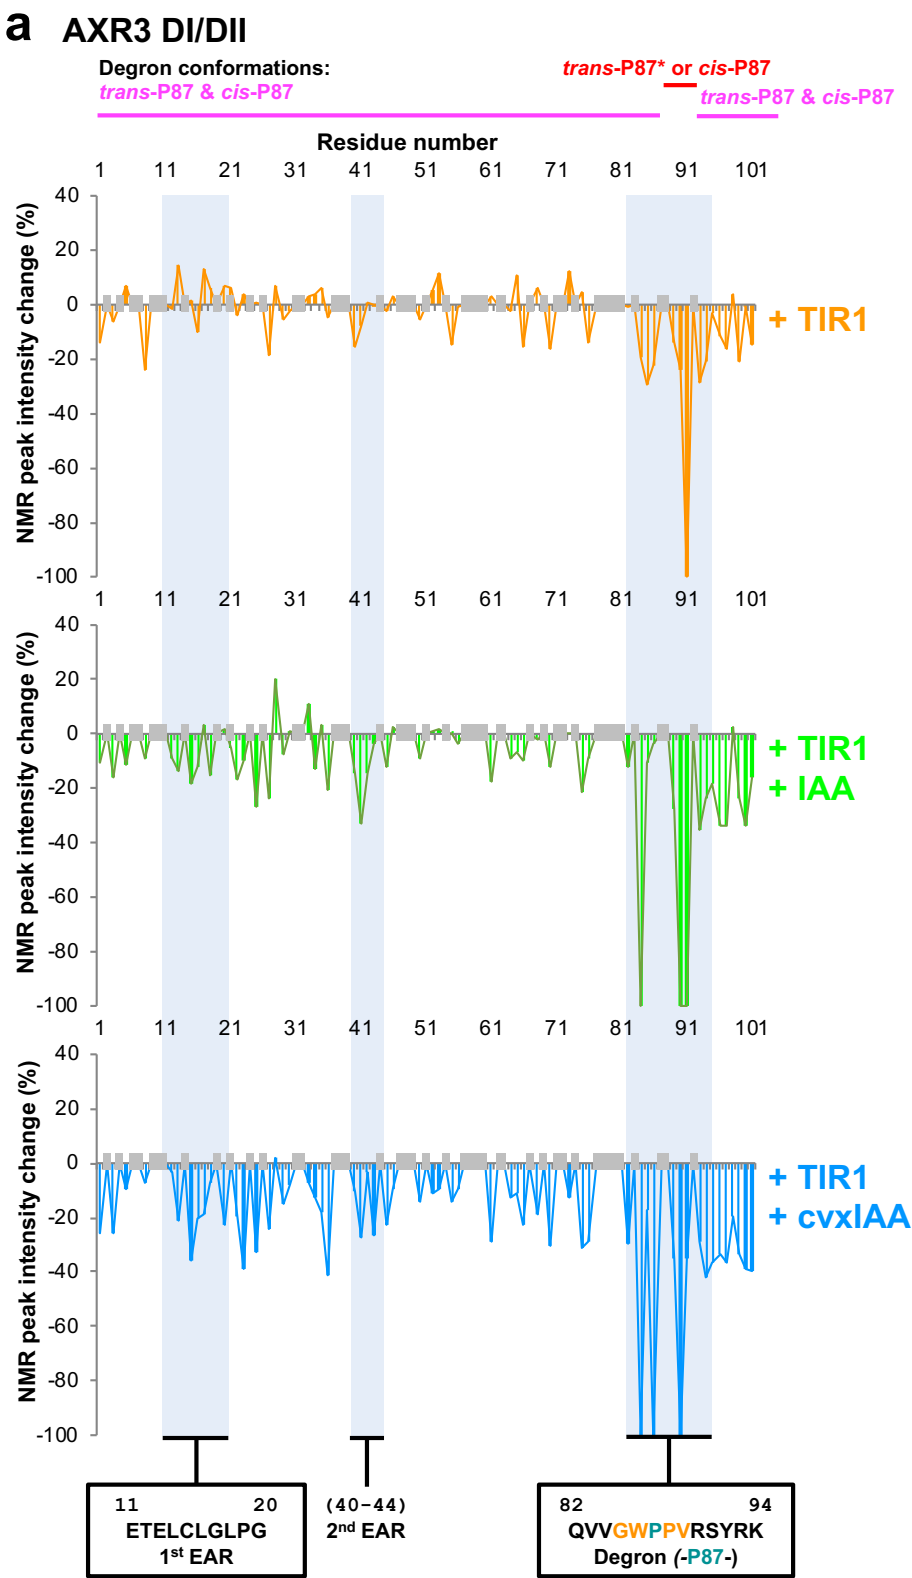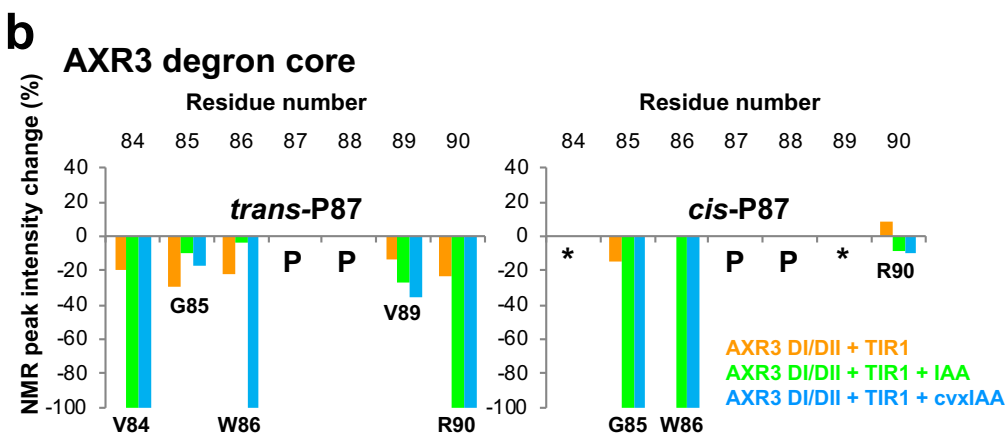

**Figure 3 | Co-receptor complex formation involves both auxin-dependent and -independent events, including ternary complex formation away from the base of the auxin binding pocket in TIR1. (a)** Percentage changes in the intensity of HN cross peaks from  $^1\text{H}$ - $^{15}\text{N}$  HSQC spectra of AXR3 DI/DII with the addition of TIR1 (orange), and TIR1 with IAA (green). A change of -100% indicates that peak intensity has decreased to the noise floor and is no longer observed. Important binding interfaces are annotated and include the EAR motifs and the degron, these regions are shaded blue on the graphs. Degron conformation labels at the top of the figure highlight regions common to both *cis*- and *trans*-P87 degron conformations in magenta and the region V84 to R90 across which clear splitting of resonances associated with either *cis*- or *trans*-P87 degron conformers in red (\*percentage changes for the *trans*-P87 degron are shown in (a), with data for both *trans*-P87 and *cis*-P87 V84 to R90 in (b)). Grey shaded bars on the graph indicate residues for which peak intensity could not be measured due to HN peak overlap or where prolines are positioned in the sequence. (b) Percentage differences for the AXR3 degron with the addition of TIR1 and IAA. Missing data points where the peak intensity could not be measured due to HN peak overlap are indicated with the symbol (\*); prolines are indicated with the symbol (P).



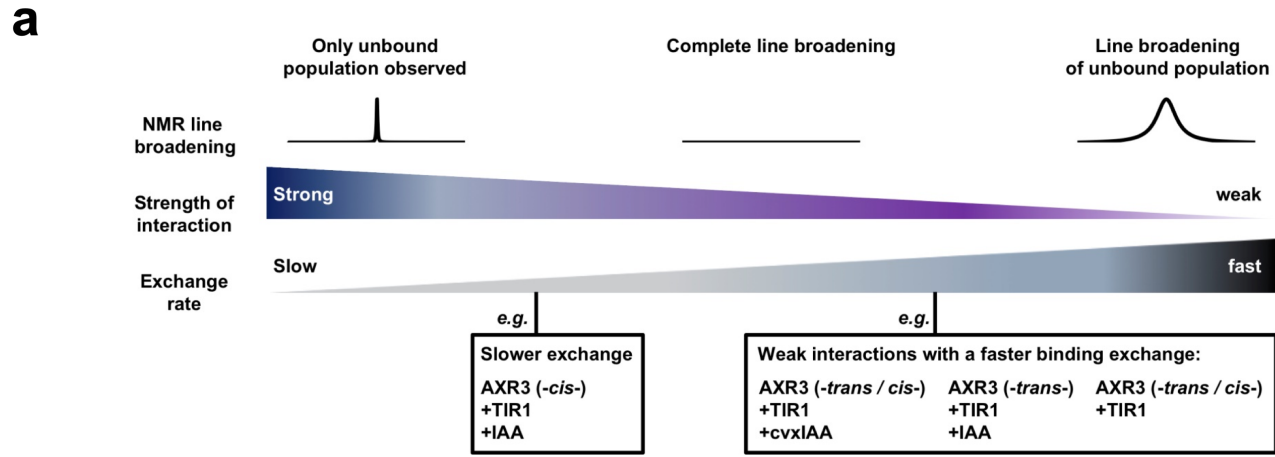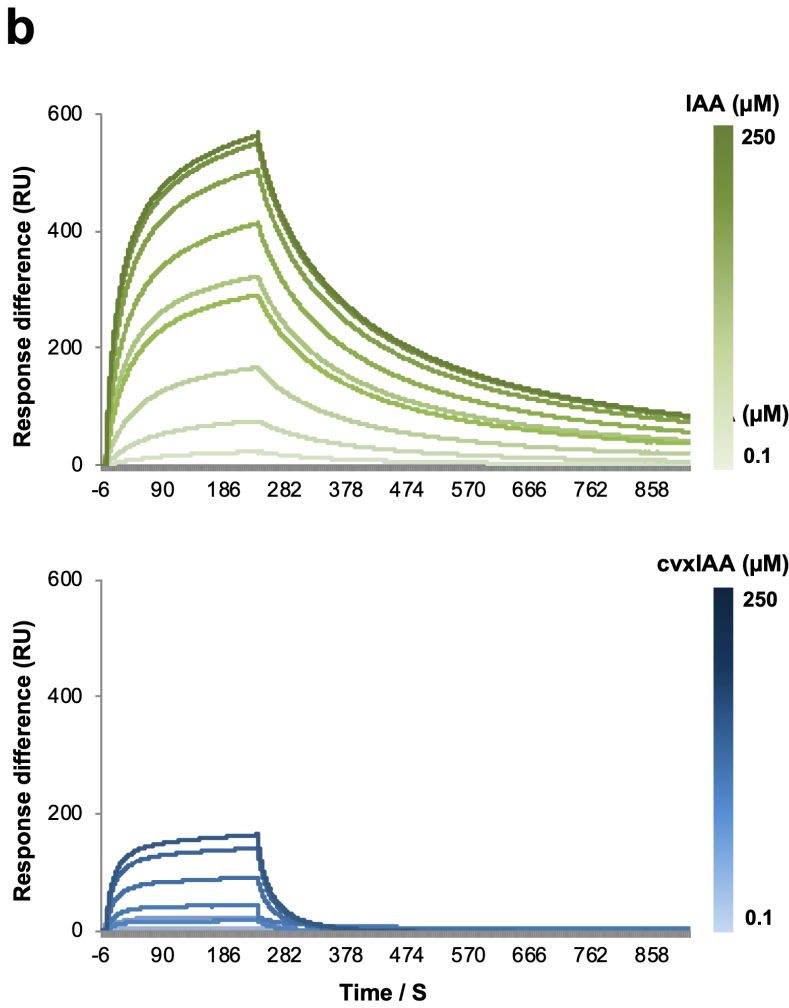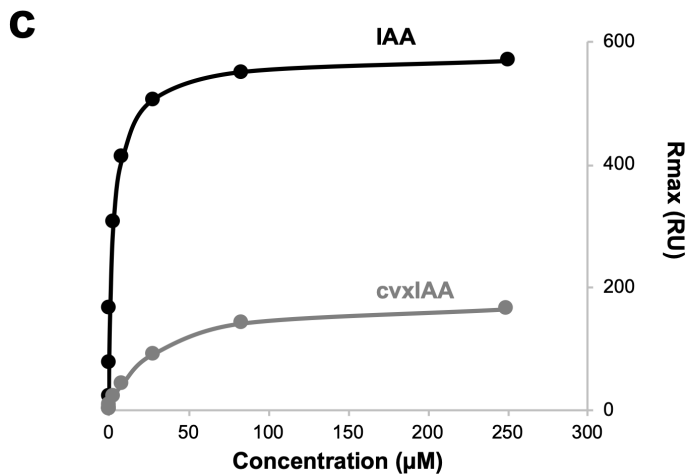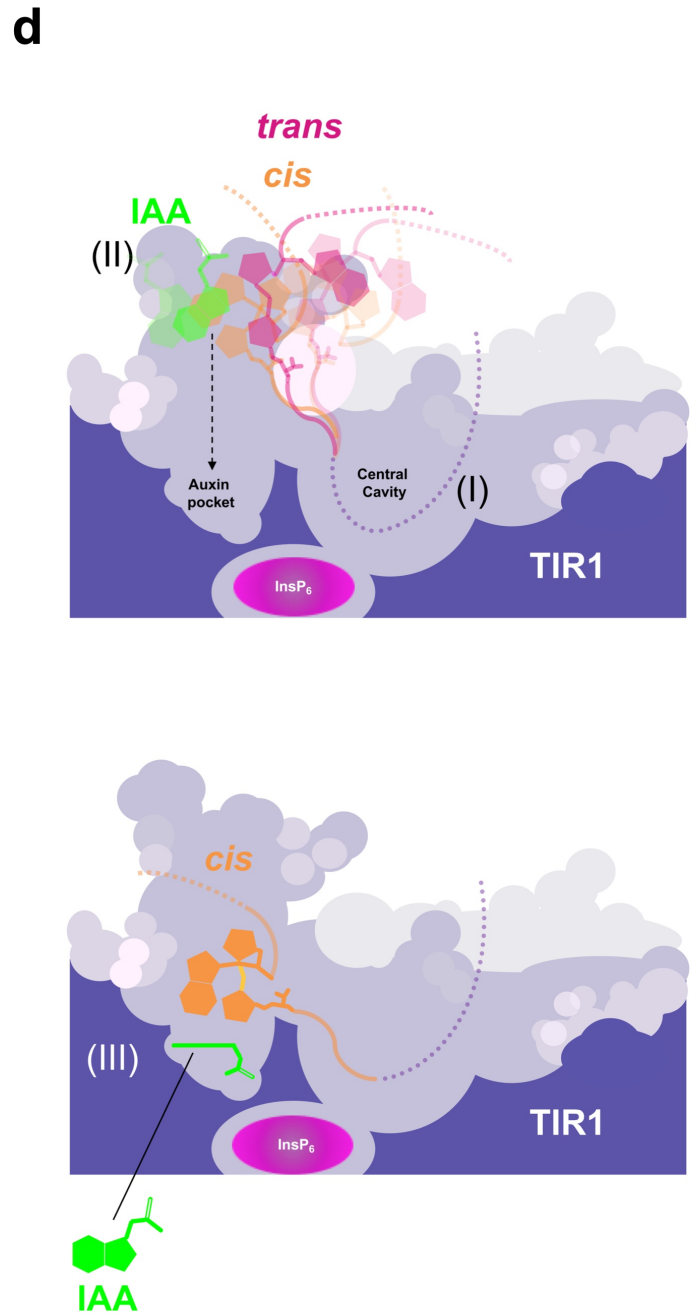

**Figure 4**

**Figure 4 | Affinity and assembly of IAA- and cvxIAA-based auxin co-receptor complexes.** (a) The relationship between NMR peak intensity and binding kinetics. The interaction of AXR3 and TIR1 with and without auxin was investigated by NMR. In these assays it is the AXR3 protein which is labelled and the focus of the observation. The interaction is observed through the association and dissociation of AXR3 from the receptor, where a binding event is represented by decreases in the NMR peak intensities and the magnitude of this change is dependent on the binding kinetics of the interaction. In NMR there is an optimum of binding kinetics for complete line-broadening, and either side of this optimum the peak intensities of this protein population will start to increase. Therefore, the magnitude of NMR peak intensity change will vary according to the affinity and binding exchange rate of the interaction being studied as indicated. (b) SPR analysis of the kinetics of binding between AXR2 degron peptide and TIR1 induced by IAA or cvxIAA (upper and lower panel respectively) (c) The response amplitude of sensorgram data shown in (b) plotted against auxin concentration. (d) Schematic representation of a cross section through the TIR1 receptor showing events during the assembly of the auxin co-receptor complex. (I) Auxin-independent binding of the Aux/IAA, particularly C-terminal to the degron core. (II) Encounter complex, where auxin (IAA) promotes interaction of the degron core and TIR1 away from the base of the auxin binding pocket. The *cis* and *trans* conformers of the degron are shown in orange and pink respectively. The transparency of the representations of the degron conformers and IAA indicate uncertainty over precise positioning during this encounter phase. (III) The lower panel shows the final binding pose of the degron based on the crystal structure<sup>14</sup>. The Aux/IAA degron in the *cis*-conformer is fully engaged with TIR1, with auxin at the base of the pocket acting as molecular glue<sup>14</sup>.
